# Supplementary material for: The effect of reverse transcription enzymes and conditions on high throughput amplicon sequencing of the 16S rRNA
Source: PeerJ journal article supplement (doi:10.7717/peerj.7608), 2019-10-25
Supplement: Equation_S1.pdf [file Equation_S1.pdf]

$$f = \frac{A-B}{A+B},$$

$$f = \frac{A}{(A+B)} - \frac{B}{A+B}$$

$$\delta f = \sqrt{\left(\frac{\partial f}{\partial A} \delta A\right)^2 + \left(\frac{\partial f}{\partial B} \delta B\right)^2}$$

$$1 \quad \frac{\partial f}{\partial A} = \frac{1(A+B) - A}{(A+B)^2} - \frac{-B}{(A+B)^2} = \frac{2B}{(A+B)^2}$$

$$\frac{\partial f}{\partial B} = \frac{-A}{(A+B)^2} - \frac{1(A+B)B}{(A+B)^2} = \frac{-2A}{(A+B)^2}$$

$$\delta f = \sqrt{\left(\frac{2B}{(A+B)^2} \delta A\right)^2 + \left(-\frac{2A}{(A+B)^2} \delta B\right)^2}$$

$$\delta f = \frac{2}{(A+B)^2} \sqrt{B^2 \delta A^2 + A^2 \delta B^2}$$

2     **Equation S1.** Finding the formula for error propagation through the normalization formula used to  
3 calculate pairwise comparisons depicted in Figure 2 and Figure S2. The formula compares taxonomic  
4 classes relative enrichment between two experimental conditions as well as scaling. The classes are  
5 expressed as A and B and the standard error corresponds to  $\delta A$  and  $\delta B$  respectively. The resulting  
6 normalized standard deviation is represented as  $\delta f$ .
