# Supplementary material for: The effect of reverse transcription enzymes and conditions on high throughput amplicon sequencing of the 16S rRNA
Source: PeerJ journal article supplement (doi:10.7717/peerj.7608), 2019-10-25
Supplement: Supplementary_figure_1.pdf [file Supplementary_figure_1.pdf]

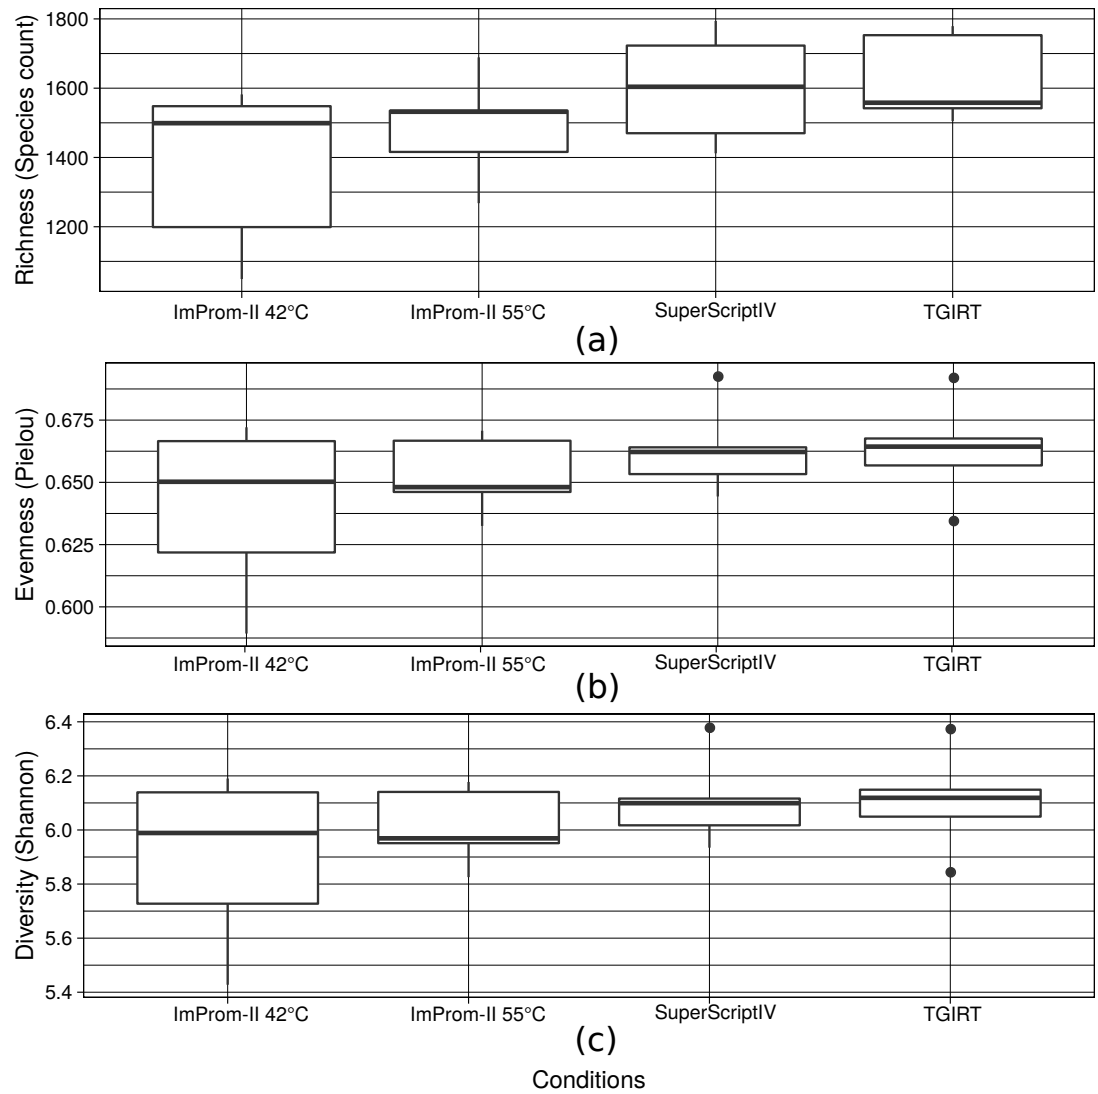

**Figure S1.** Diversity plot displaying species richness, Pielou evenness, and Shannon diversity for a variety of experimental conditions (X-axis). Species richness is represented as species count. Each category is an average of 4 biological replicates.
