# Supplementary material for: The effect of reverse transcription enzymes and conditions on high throughput amplicon sequencing of the 16S rRNA
Source: PeerJ journal article supplement (doi:10.7717/peerj.7608), 2019-10-25
Supplement: Supplementary_Figure_2.pdf [file Supplementary_Figure_2.pdf]

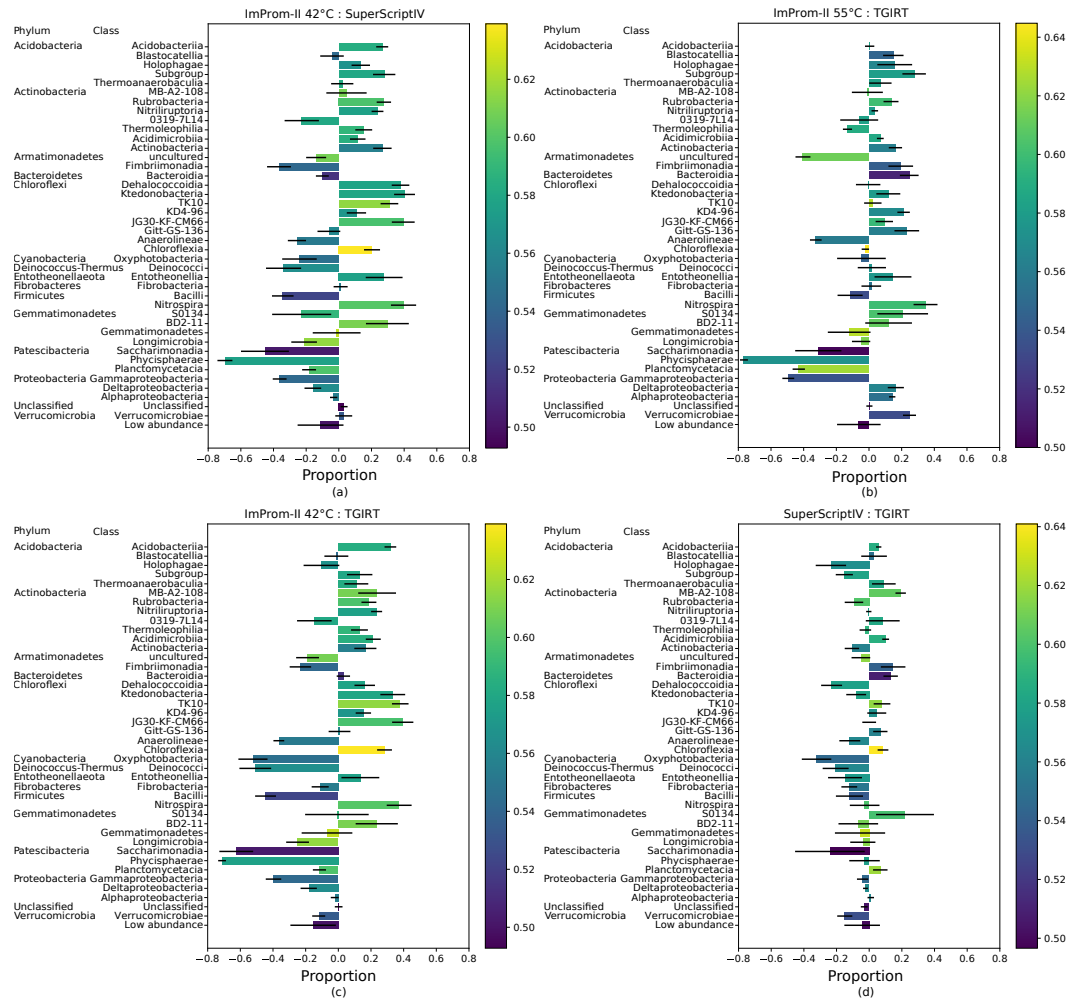

**Figure S2.** A proportional comparison of most abundant classes between the ImProm-II at 42 °C and SuperScriptIV (a), the ImProm-II at 55 °C and TGIRT (b), ImProm-II at 42 °C and TGIRT (c) and TGIRT and SuperScriptIV (d). Enrichment is expressed such that a class that is equally proportional in both conditions, has a value of 0. If the class shows in one condition, but its absent from another, its value would be equal to 1 or -1 respectively. Furthermore a weighted average of the GC content of each class is expressed as the bar color. Each value is an average of 4 biological replicates with the error bars representing the scaled standard deviation.
